# Supplementary material for: Inhibition mechanism of SAHA in HDAC: a revisit
Source: Royal Society of Chemistry journal article supplement (doi:10.1039/c5cp05633k), 2015-01-01
Supplement: c5cp05633k1.pdf [file c5cp05633k1.pdf]

## Captions for the five movie/mpg files

### 1. HDAC2-SAHA-Ca-K.mpg

Title: The “Metal-dependent” regulatory effect for the  $\text{Ca}^{2+} \rightarrow \text{K}^+$  mutant model.

Description: The remote “second metal site” dependent regulatory effect on the deprotonation of SAHA in HDAC2 after the  $\text{Ca}^{2+} \rightarrow \text{K}^+$  mutation. The proton on the SAHA:O1 atom could rapidly transfer to the H145 residue after the  $\text{Ca}^{2+} \rightarrow \text{K}^+$  mutation.

### 2. HDAC2-SAHA-Ca-K-Y308H.mpg

Title: The “Metal-dependent” regulatory effect for the  $\text{Ca}^{2+} \rightarrow \text{K}^+/\text{Y308H}$  mutant model.

Description: The remote “second metal site” dependent regulatory effect on the deprotonation of SAHA in HDAC2 after the  $\text{Ca}^{2+} \rightarrow \text{K}^+/\text{Y308H}$  mutation. The proton on the SAHA:O1 atom could rapidly transfer to the H145 residue after the  $\text{Ca}^{2+} \rightarrow \text{K}^+/\text{Y308H}$  mutation.

### 3. HDAC2-SAHA-Ca-No.mpg

Title: The “Metal-dependent” regulatory effect for the  $\text{Ca}^{2+} \rightarrow \text{No}$  mutant model.

Description: The remote “second metal site” dependent regulatory effect on the deprotonation of SAHA in HDAC2 after the  $\text{Ca}^{2+} \rightarrow \text{No}$  mutation. The proton on the SAHA:O1 atom could rapidly transfer to the H145 residue after the  $\text{Ca}^{2+} \rightarrow \text{No}$  mutation.

### 4. HDAC2-SAHA-wild type.mpg

Title: The “Metal-dependent” regulatory effect for the wild type model.

Description: The remote “second metal site” dependent regulatory effect on the deprotonation of SAHA in the wild type HDAC2. The proton on the SAHA:O1 atom could hardly transfer to the H145 residue in the wild type HDAC2.

### 5. HDAC2-SAHA-Y308H.mpg

Title: The “Metal-dependent” regulatory effect for the Y308H mutant model.

Description: The remote “second metal site” dependent regulatory effect on the deprotonation of SAHA in HDAC2 after the Y308H mutation. The proton on the SAHA:O1 atom could hardly transfer to the H145 residue after the Y308H mutation.
